# Supplementary material for: Construction of three-dimensional anionic molecular frameworks based on hydrogen-bonded metal dithiolene complexes and the crystal solvent effect
Source: Royal Society of Chemistry journal article supplement (doi:10.1039/c9ce00364a), 2019-01-01
Supplement: c9ce00364a1.pdf [file c9ce00364a1.pdf]

## Electronic Supplementary Information (ESI)

### **Construction of three-dimensional anionic molecular frameworks based on hydrogen-bonded metal-dithiolene complexes and the crystal solvent effect**

So Yokomori,<sup>a</sup> Akira Ueda,<sup>\*a</sup> Toshiki Higashino,<sup>a</sup> Reiji Kumai,<sup>b</sup> Youichi Murakami<sup>b</sup> and Hatsumi Mori<sup>\*a</sup>

<sup>a</sup>*The Institute for Solid State Physics, The University of Tokyo, Kashiwa, Chiba 2778581, Japan.*

*E-mail: a-ueda@issp.u-tokyo.ac.jp, hmori@issp.u-tokyo.ac.jp; Fax: +81 4 7136 3410; Tel: +81 4 7136 3410*

<sup>b</sup>*Condensed Matter Research Center (CMRC) and Photon Factory, Institute of Materials Structure Science, High Energy Accelerator Research Organization (KEK), Tsukuba, Ibaraki 3050801, Japan.*

#### **Table of Contents**

|                                                                                                                                                                       |       |
|-----------------------------------------------------------------------------------------------------------------------------------------------------------------------|-------|
| 1. Additional figures of the crystal structure of $(\text{Ph}_4\text{P})[\text{Au}(\text{catdt})_2] \cdot 0.5\text{H}_2\text{O}$ , <b>3a</b> .....                    | S2–S3 |
| 2. Additional figures of the crystal structure of $(\text{Ph}_4\text{P})[\text{Au}(\text{catdt})_2] \cdot \text{Et}_2\text{O} \cdot n(\text{solv})$ , <b>3b</b> ..... | S4–S5 |
| 3. Additional figures of the crystal structure of $(\text{Ph}_4\text{P})[\text{Au}(\text{catdt})_2] \cdot 2\text{THF}$ , <b>3c</b> .....                              | S6–S7 |
| 4. Figures of the crystal structure of $(\text{Ph}_4\text{P})_3[\text{Au}(\text{catdt})_2]\text{Br}_n\text{Cl}_{2-n}$ , <b>2</b> .....                                | S8    |
| 5. References .....                                                                                                                                                   | S9    |

1.  $(\text{Ph}_4\text{P})[\text{Au}(\text{catdt})_2] \cdot 0.5\text{H}_2\text{O}$ , **3a**

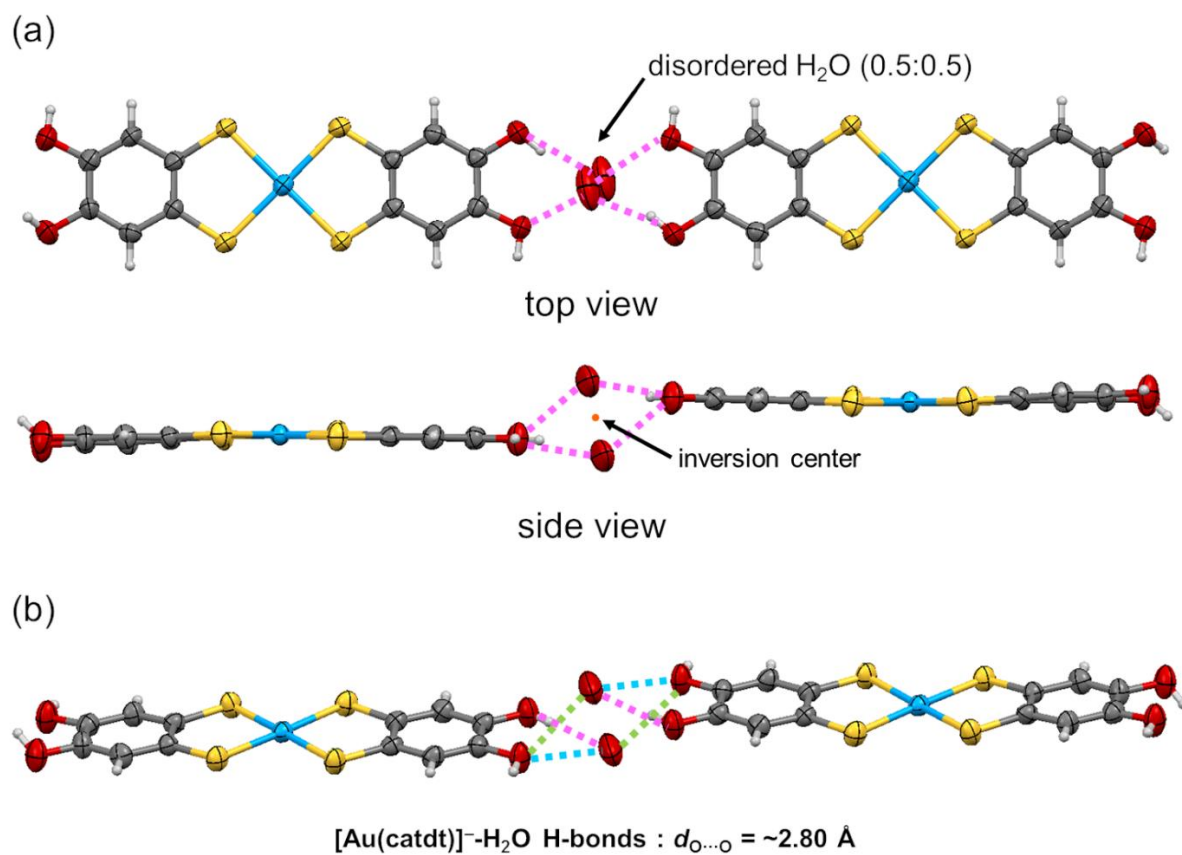

**Fig. S1.** Hydrogen-bonded motif positionally disordered  $\text{H}_2\text{O}$  molecules (0.5:0.5) and H-bonds between  $[\text{Au}(\text{catdt})_2]^-$  and  $\text{H}_2\text{O}$  in **3a**. (a) top view (top), side view (bottom) and (b) diagonal view. The thermal ellipsoids are scaled to the 50% probability level. Crystallographically equivalent H-bonds are shown in the same color dashed line in (b).

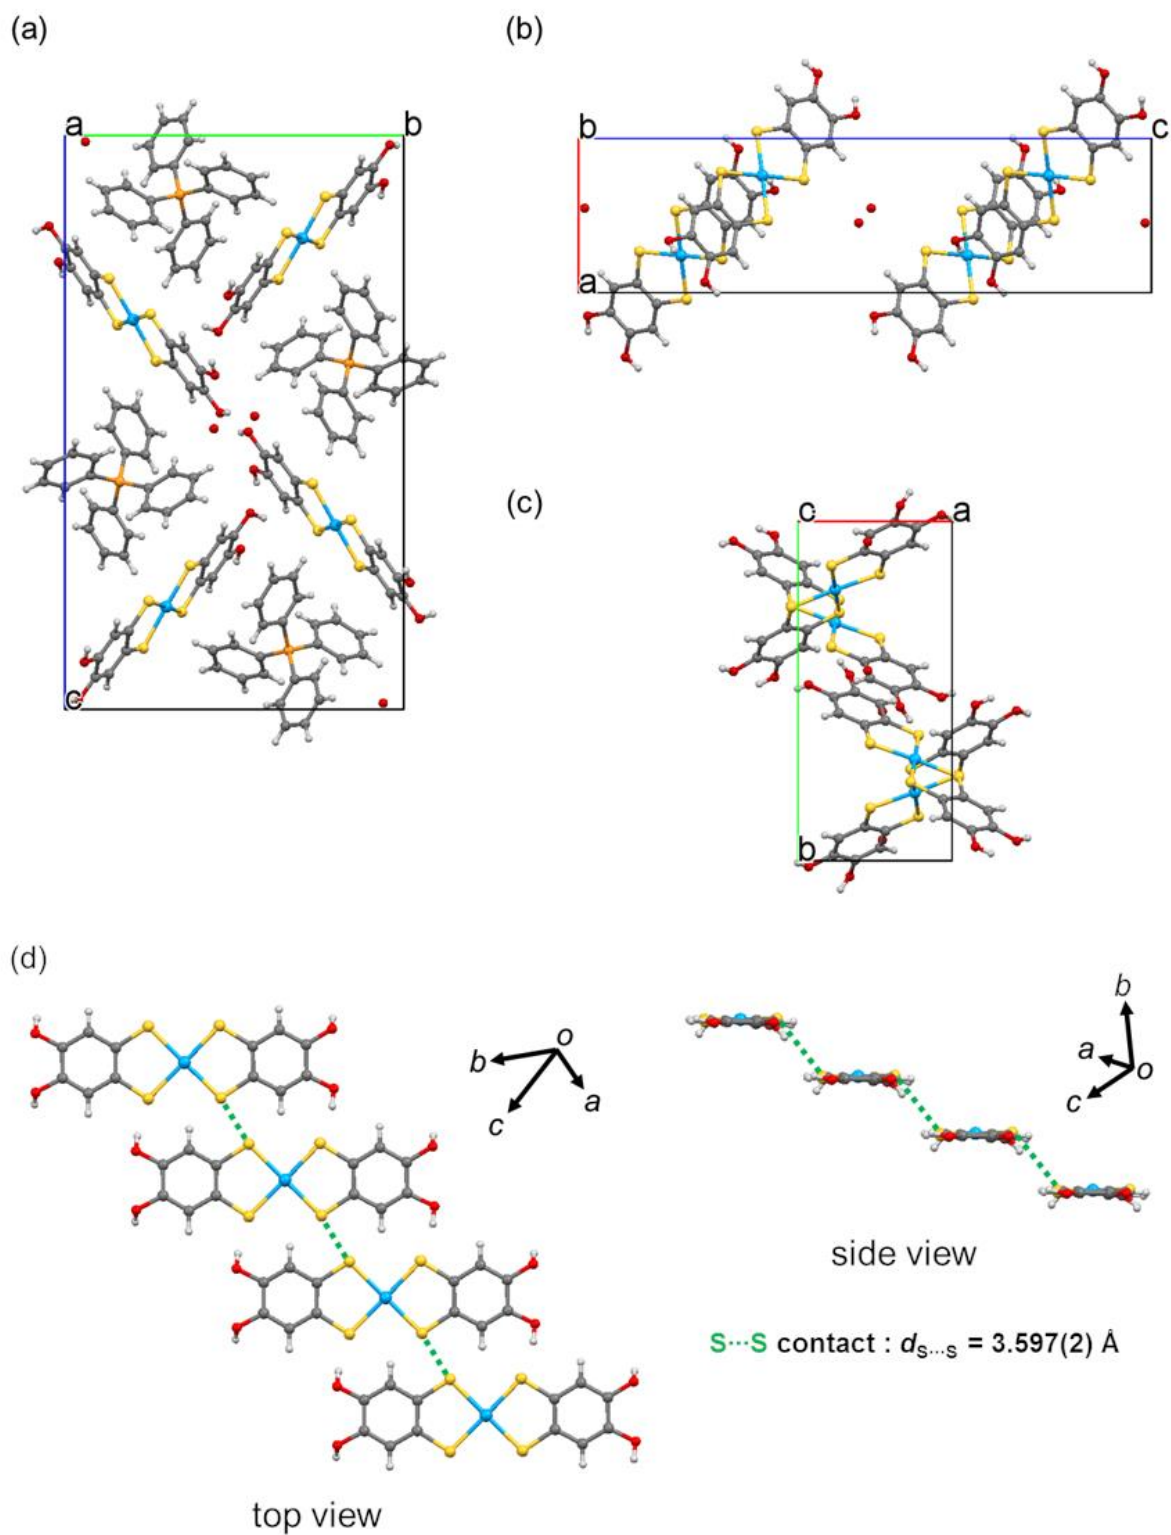

**Fig. S2.** Molecular arrangements in the unit cell of **3a**, viewed along the (a)  $a$ , (b)  $b$  and (c)  $c$  axis, respectively.  $\text{Ph}_4\text{P}^+$  cations are omitted in (b) and (c) for clarity. (d) Top view (left) and side view (right) of  $[\text{Au}(\text{catdt})_2]^-$  molecules in 2D sheet on 3D framework.

2.  $(\text{Ph}_4\text{P})[\text{Au}(\text{catdt})_2] \cdot \text{Et}_2\text{O} \cdot n(\text{solv}), \mathbf{3b}$

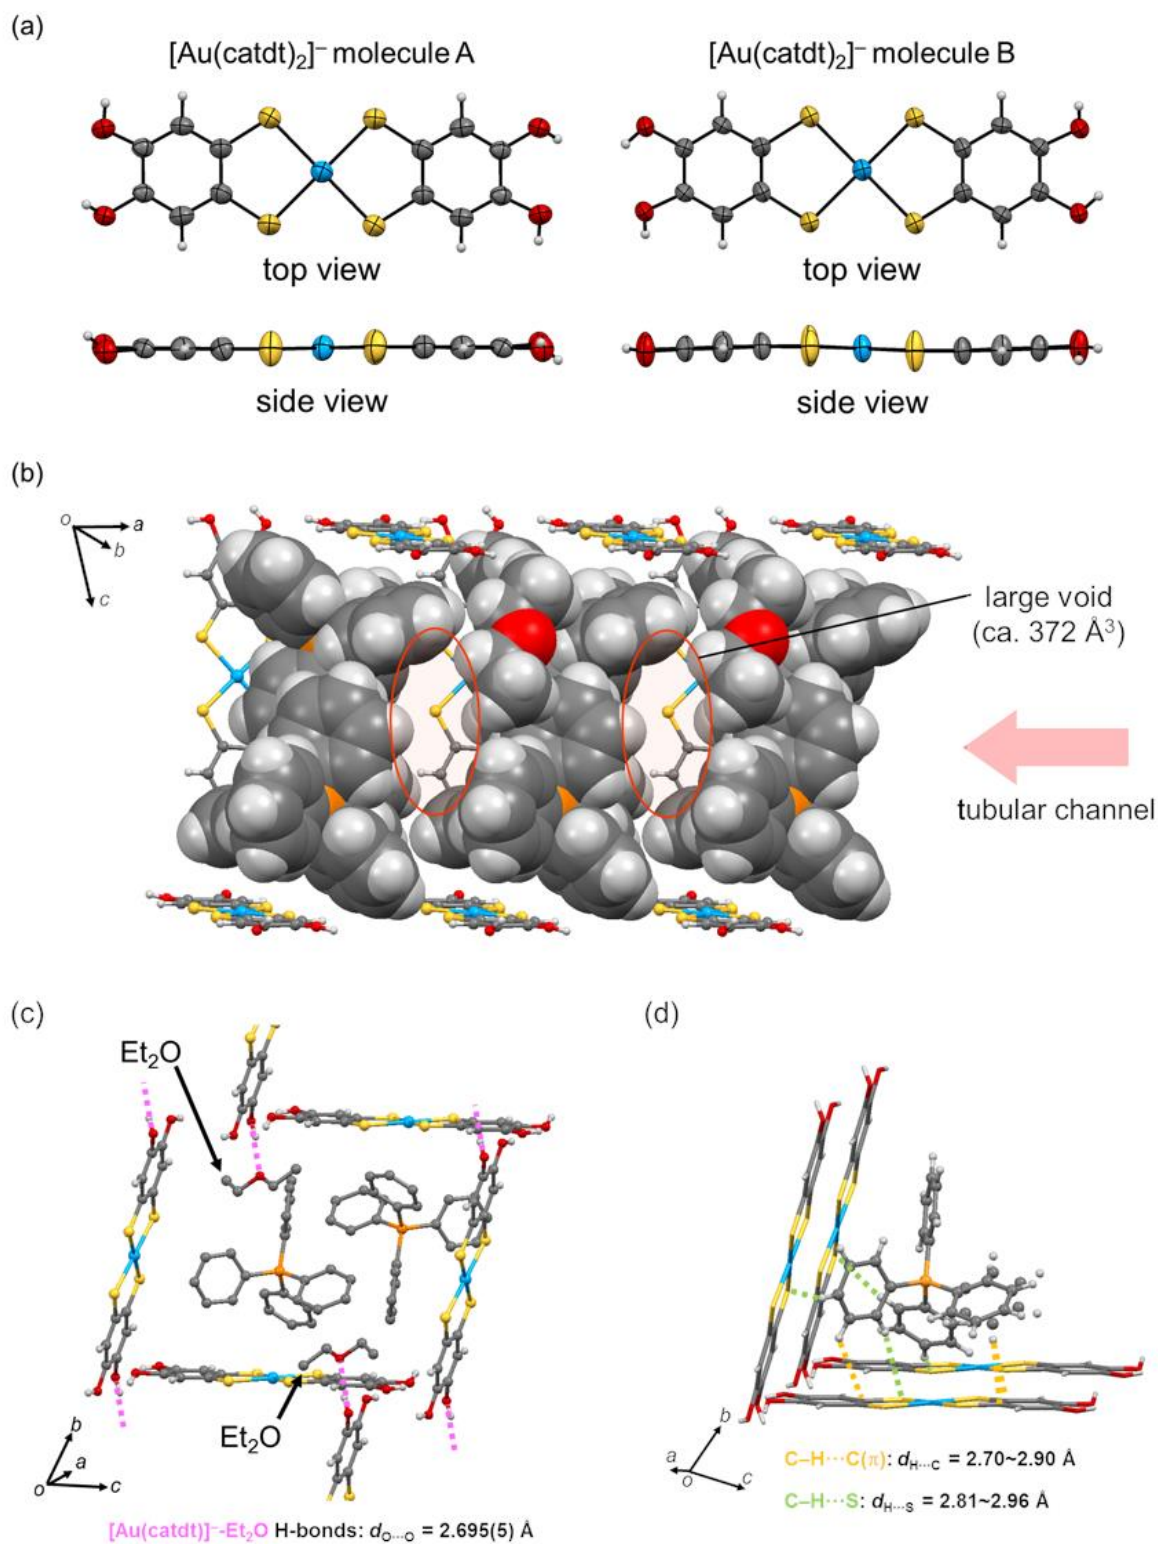

**Fig. S3.** (a) ORTEP drawings of two kinds of  $[\text{Au}(\text{catdt})_2]^-$  molecules in **3a**; top view (top), side view (bottom). The thermal ellipsoids are scaled to the 50% probability level. (b) Voids formed between

Ph<sub>4</sub>P<sup>+</sup> and Et<sub>2</sub>O molecules in the 1D channel. The volume of each void was calculated to be about 370 Å<sup>3</sup> by the Platon/SQUEEZE program<sup>S1</sup>. According to the crystal structure data, there should be solvent molecules in these voids; however, they are highly disordered and not to be determined. Thus their electron densities were removed by the Platon/SQUEEZE program. (c) Intermolecular H-bonds between [Au(catdt)<sub>2</sub>]<sup>-</sup> and Et<sub>2</sub>O in the tubular channel of the framework. Hydrogen atoms on Ph<sub>4</sub>P<sup>+</sup> and Et<sub>2</sub>O molecules are omitted in (c) and disordered phenyl group is omitted in (b) and (c) for clarify. (d) Intermolecular short contacts between [Au(catdt)<sub>2</sub>]<sup>-</sup> (framework) and Ph<sub>4</sub>P<sup>+</sup>.

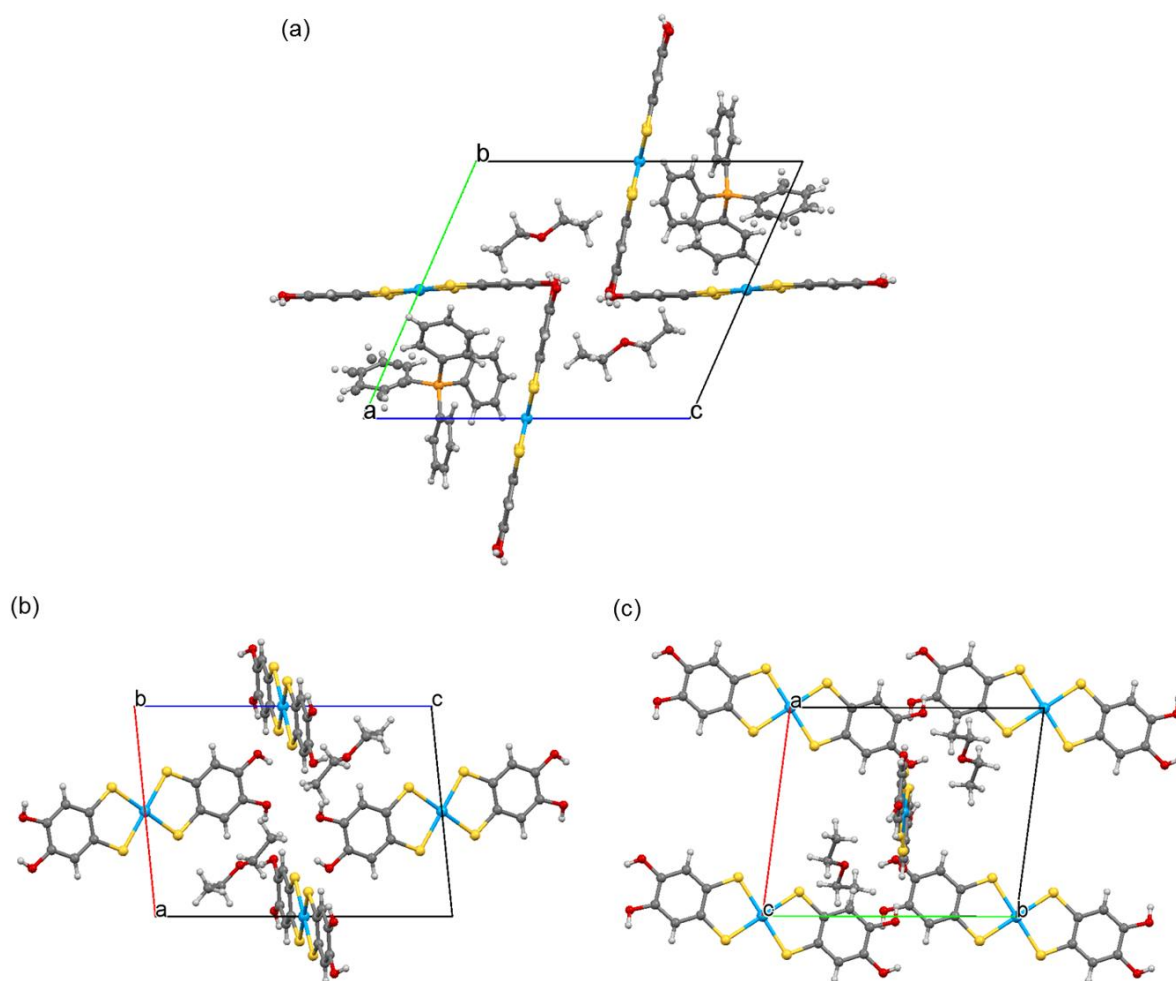

**Fig. S4.** Molecular arrangements in the unit cell of **3b**, viewed along the (a) *a*, (b) *b* and (c) *c* axis, respectively.  $\text{Ph}_4\text{P}^+$  cations are omitted in (b) and (c) for clarify.





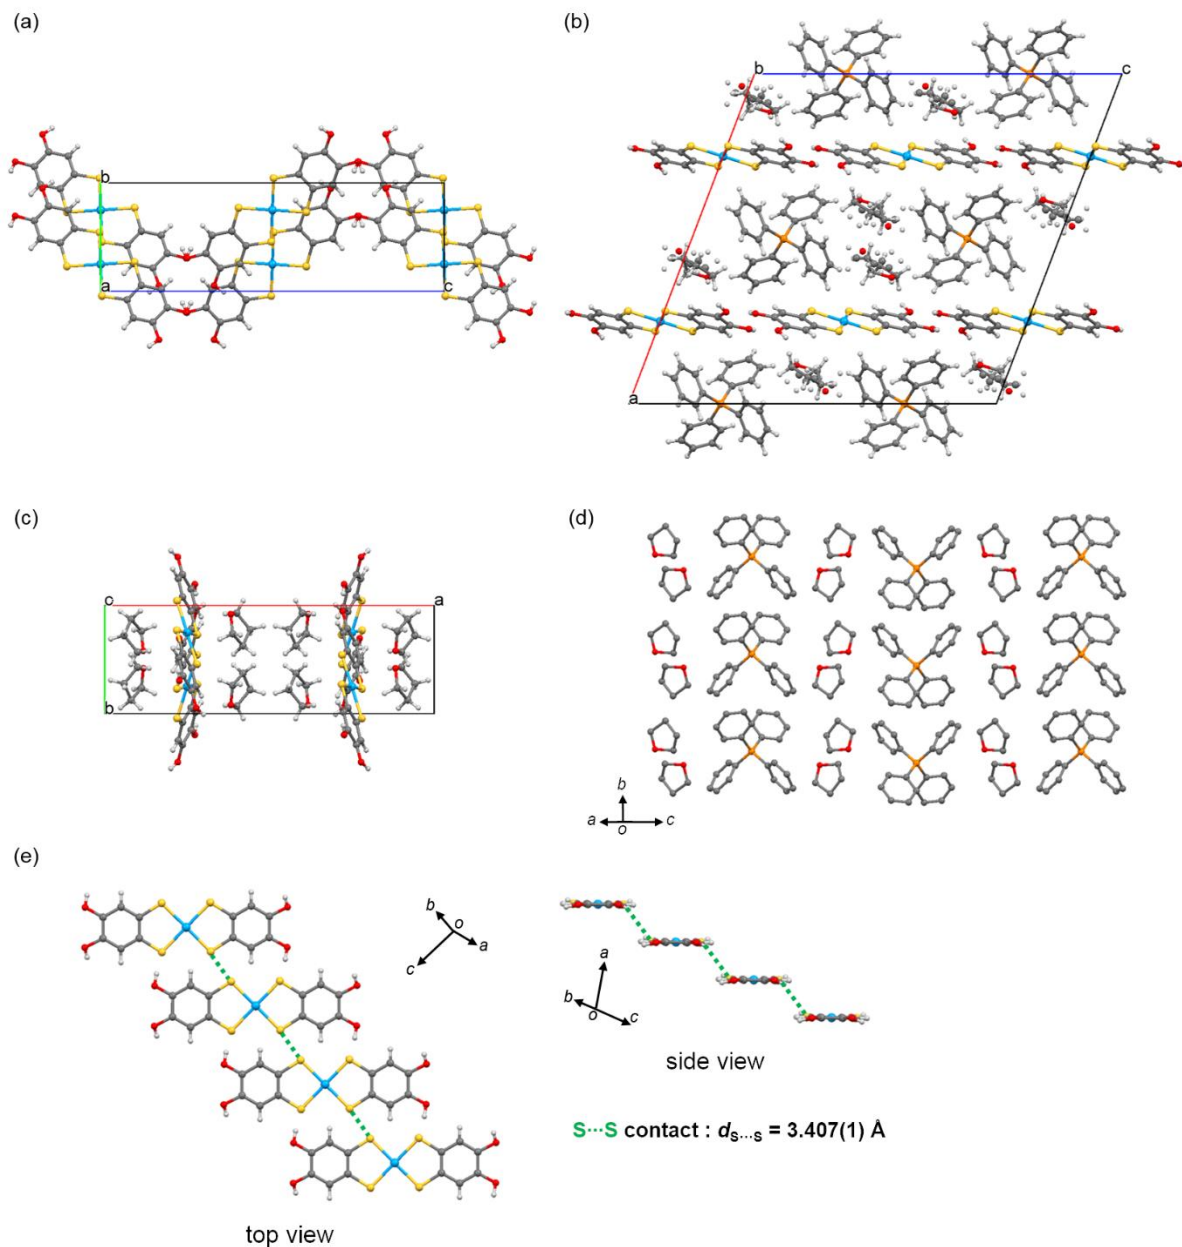

**Fig. S6.** Molecular arrangements in the unit cell of **3c**, viewed along the (a)  $a$ , (b)  $b$  and (c)  $c$  axis, respectively. For clarify,  $\text{Ph}_4\text{P}^+$  cations and THF molecules are omitted in (a) and  $\text{Ph}_4\text{P}^+$  cations are omitted in (c). (d) Top view of  $\text{Ph}_4\text{P}^+$  and THF layer seen from vertical direction to 2D layer of  $[\text{Au}(\text{catdt})_2]^-$  (the same direction as Fig.10a). Hydrogen atoms are omitted in (d) for clarify. (e) Top view (left) and side view (right) of  $[\text{Au}(\text{catdt})_2]^-$  molecules of 2D layer.



#### 4. $(\text{Ph}_4\text{P})_3[\text{Au}(\text{catdt})_2] \cdot \text{Br}_n\text{Cl}_{2-n}$ , **2**

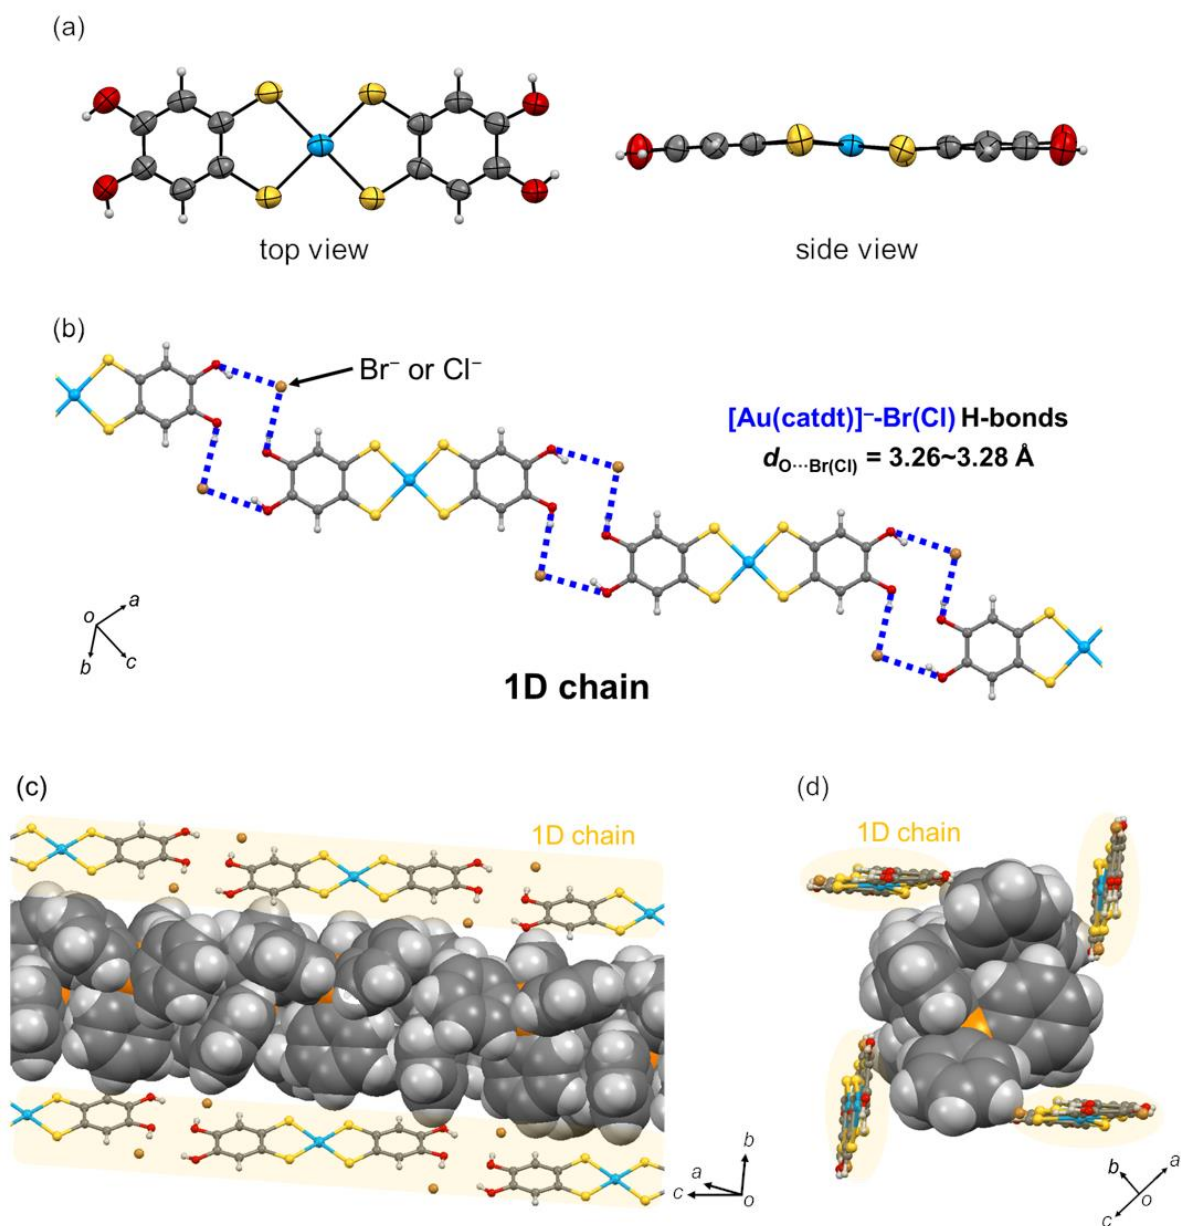

**Fig. S7.** The crystal structure of anion salt **2**. (a) ORTEP drawings of  $[\text{Au}(\text{catdt})_2]^-$ ; top view (left), side view (right). The thermal ellipsoids are scaled to the 50% probability level. (b) The 1D chain structure formed through intermolecular H-bonds between  $[\text{Au}(\text{catdt})_2]^-$  and  $\text{Br}^-$  (or  $\text{Cl}^-$ ). (c) Arrangement manner of the 1D chain structures separated by  $\text{Ph}_4\text{P}^+$  cations, viewed along the (c) parallel and (d) vertical direction to the chain. (d)  $\text{Cl}^-$  anions are omitted for clarify in (b), (c) and (d).

## 5. References

- S1. (a) P. v. d. Sluis and A. L. Spek, *Acta Crystallogr., Sect. A: Found. Crystallogr.*, 1990, **46**, 194–201;  
(b) A. L. Spek, *Acta Crystallogr., Sect. D: Biol. Crystallogr.*, 2009, **65**, 148–155. (c) A. L. Spek, *Acta Crystallogr. Sect. C* 2015, **71**, 9.
